# Supplementary material
Source: PubMed Central journal article supplement (PMC4819248)
Supplement: NIHMS771523-supplement-Supplemental_Table_3.pdf [file NIHMS771523-supplement-Supplemental_Table_3.pdf]

**Table 3:** Adjusted mean differences<sup>a</sup> (95% CI) in infant birth weight (grams) for selected maternal characteristics among Smart Gravid study participants and among all Danish births, Danish Medical Birth Registry data 2008-2012, singleton live births only.

|                                   | N    | Smart Gravid<br>N=4801       |                                          | Danish Medical Birth Registry<br>N=239,791 |                                          |
|-----------------------------------|------|------------------------------|------------------------------------------|--------------------------------------------|------------------------------------------|
|                                   |      | Crude Mean<br>Difference (g) | Adjusted Mean<br>Difference (95% CI) (g) | Crude Mean<br>Difference (g)               | Adjusted Mean<br>Difference (95% CI) (g) |
| Maternal age                      |      |                              |                                          |                                            |                                          |
| <25                               | 509  | -1                           | 14 (-42, 70)                             | -59                                        | 9 (1, 16)                                |
| 25-29                             | 1930 | 0 (ref)                      | 0 (ref)                                  | 0 (ref)                                    | 0 (ref)                                  |
| 30-34                             | 1744 | -0.2                         | -52 (-90, -14)                           | 40                                         | -11 (-17, -6)                            |
| ≥35                               | 618  | 39                           | -56 (-110, -3)                           | 39                                         | -36 (-43, -30)                           |
| Smoking                           |      |                              |                                          |                                            |                                          |
| Non-smoker                        | 4331 | 0 (ref)                      | 0 (ref)                                  | 0 (ref)                                    | 0 (ref)                                  |
| Smoker                            | 359  | -171                         | -184 (-247, -122)                        | -186                                       | -192 (-199, -185)                        |
| Quit during pregnancy             | 84   | -65                          | -40 (-160, 81)                           | -18                                        | 1 (-12, 14)                              |
| Current smoker 1-10 cig/day       | 189  | -155                         | -177 (-261, -93)                         | -216                                       | -224 (-233, -215)                        |
| Current smoker >10 cig/day        | 82   | -314                         | -340 (-467, -212)                        | -285                                       | -315 (-326, -299)                        |
| Parity                            |      |                              |                                          |                                            |                                          |
| Nulliparous                       | 3201 | 0 (ref)                      | 0 (ref)                                  | 0 (ref)                                    | 0 (ref)                                  |
| Parous                            | 1493 | 182                          | 188 (147, 216)                           | 170                                        | 176 (171, 181)                           |
| Maternal BMI (kg/m <sup>2</sup> ) |      |                              |                                          |                                            |                                          |
| <20                               | 624  | -120                         | -121 (-170, -72)                         | -135                                       | -124 (-131, -117)                        |
| 20-24                             | 2351 | 0 (ref)                      | 0 (ref)                                  | 0 (ref)                                    | 0 (ref)                                  |
| 25-29                             | 973  | 81                           | 60 (16, 100)                             | 70                                         | 67 (61, 73)                              |
| ≥30                               | 586  | 104                          | 103 (52, 153)                            | 104                                        | 107 (100, 114)                           |

<sup>a</sup>Adjusted for smoking, parity, maternal age, BMI.
